# Supplementary material
Source: PubMed Central journal article supplement (PMC2790009)
Supplement: NIHMS158998-supplement-1_si_001.pdf [file NIHMS158998-supplement-1_si_001.pdf]

## Supplementary Information

Ferric Stability Constants of Some Representative Marine Siderophores: Marinobactins, Aquachelins, and Petrobactin.

*Guangping Zhang, Shady A. Amin, Frithjof C. Küpper, Pamela D. Holt, Carl J. Carrano, Alison Butler*

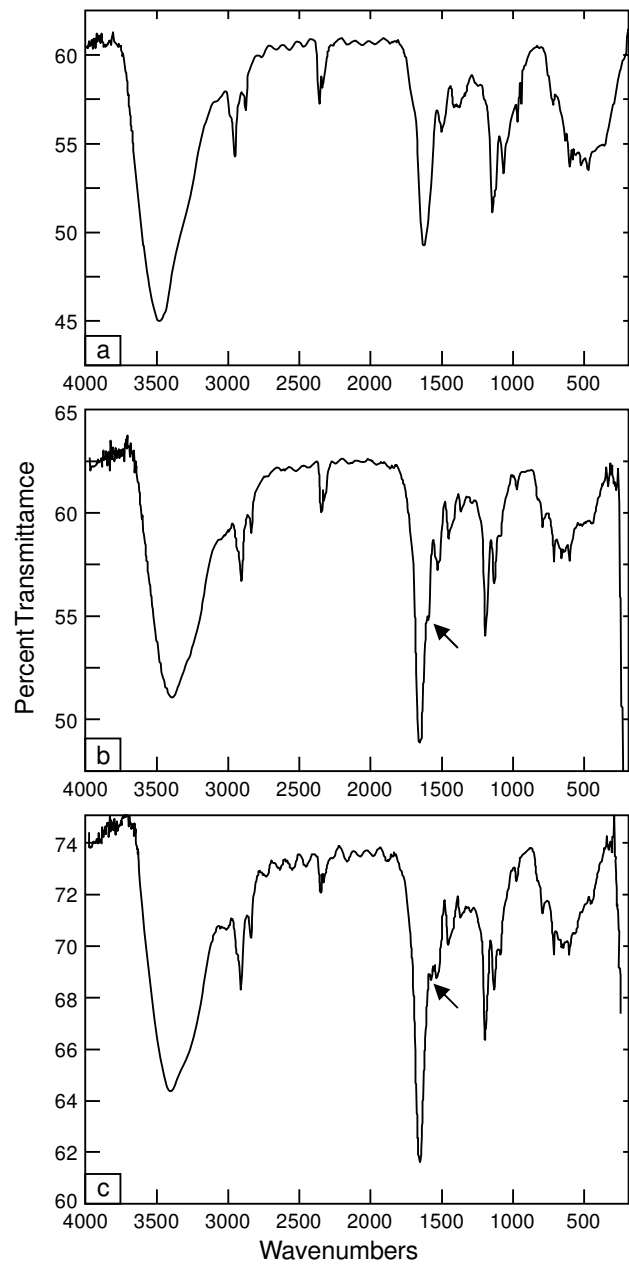

Figure S1. IR spectrum of **a.** apo-marinobactin C; **b.** Ga(III)-marinobactin C; **c.** Fe(III)-marinobactin C.

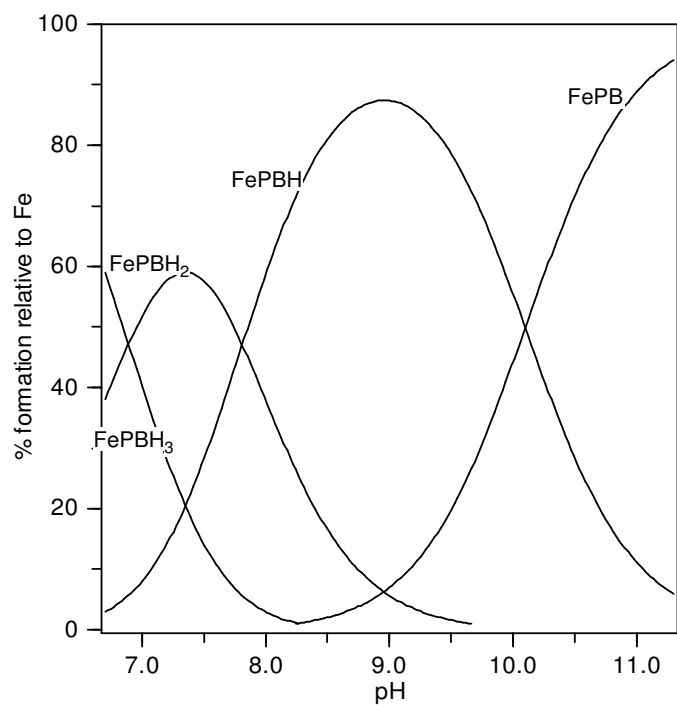

Figure S2. Species distribution diagram for Fe-Petrobactin between pH 6.7-11.3.

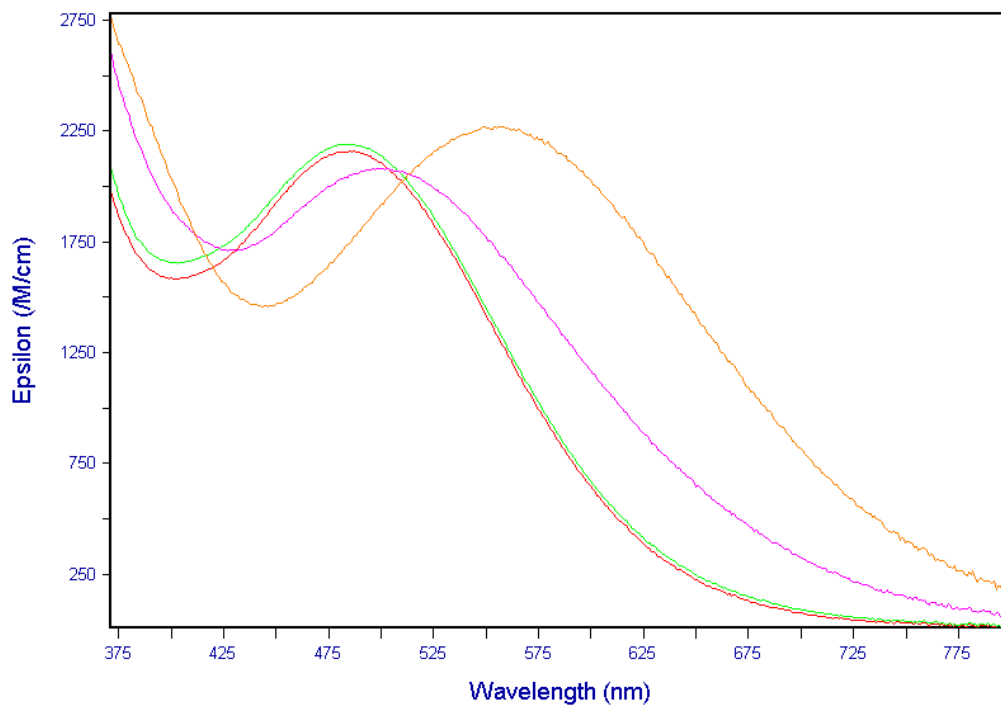

Figure S3. Calculated spectra from the spectrophotometric titration for the different protonated states of Fe(III)-petrobactin from pH 11.3 to 6.7. Spectra were calculated using SpecFit/32. FePB<sup>3-</sup> is shown in red, FeHPB<sup>2-</sup> in green, FeH<sub>2</sub>PB<sup>-</sup> in purple, and FeH<sub>3</sub>PB in orange.
